# Supplementary material for: An Improved Stress-Scale Specifically Designed to Measure Stress of Women with Newly Diagnosed Breast Cancer
Source: MDPI journal article supplement (doi:10.3390/ijerph18052346), 2021-02-27
Supplement: s1 [file s1]

**Supplementary Information. Item scores of NDBCSS-R.**

| Content                                                                                                                                        | scores          |
|------------------------------------------------------------------------------------------------------------------------------------------------|-----------------|
|                                                                                                                                                | Mean $\pm$ SD   |
| 1. I often cry                                                                                                                                 | 3.25 $\pm$ 0.75 |
| 2. Illness makes me worry about my family                                                                                                      | 3.28 $\pm$ 0.72 |
| 3. Loss of the breast will affect my life                                                                                                      | 2.74 $\pm$ 0.86 |
| 4. I have fear, anxiety and depression                                                                                                         | 2.12 $\pm$ 0.81 |
| 5. Illness makes me worry about my job                                                                                                         | 2.46 $\pm$ 0.92 |
| 6. I cannot make decision for my breast cancer treatment                                                                                       | 3.03 $\pm$ 0.83 |
| 7. I think the road of anti-cancer is lonely, hard and there is a lack of support                                                              | 2.36 $\pm$ 0.94 |
| 8. I am worried that my arm cannot lift heavy weight and it will affect my life and work                                                       | 2.15 $\pm$ 0.90 |
| 9. I am worried that my economic conditions cannot deal with the required medical expenses                                                     | 3.14 $\pm$ 0.80 |
| 10. I am very worried about the uncertainty of the progression of illness                                                                      | 2.32 $\pm$ 0.95 |
| 11. I am worried about the side effects caused by chemotherapy: such as physical discomfort, change of appearance, or future birth plans, etc. | 2.32 $\pm$ 0.81 |
| 12. Loss of the breast will affect my attractiveness to my partner                                                                             | 2.70 $\pm$ 0.87 |
| 13. Insufficient breast cancer information scares me                                                                                           | 2.37 $\pm$ 0.91 |
| 14. I can accept the staging of breast cancer                                                                                                  | 2.98 $\pm$ 0.85 |
| 15. I can accept the diagnosis of breast cancer                                                                                                | 3.13 $\pm$ 0.77 |
| 16. I can able to make proper arrangements and deal with things affected by illness                                                            | 3.05 $\pm$ 0.68 |
| 17. I use some adaptation methods to face cancer                                                                                               | 3.13 $\pm$ 0.64 |
